# Supplementary material for: Changes in the gene mutation profiles of circulating tumor DNA detected using CAPP-Seq in neoadjuvant chemotherapy-treated advanced ovarian cancer
Source: PubMed Central journal article supplement — Oncol Lett. 2020 Jan 28;19(4):2713–20. doi: 10.3892/ol.2020.11356 (PMC7068231; doi:10.3892/ol.2020.11356), 2020-01-28
Supplement: Supplementary_Data.pdf [file Supplementary_Data.pdf]

Figure S1. Changes in the circulating tumor DNA concentration post-NAC compared with measured pre-NAC in (A) NAC-sensitive and (B) resistant patient groups. The statistical analyses were performed using the Mann-Whitney U test.  $P < 0.05$  was considered to indicate a statistically significant difference. NAC, neoadjuvant chemotherapy.

A NAC-sensitive cases

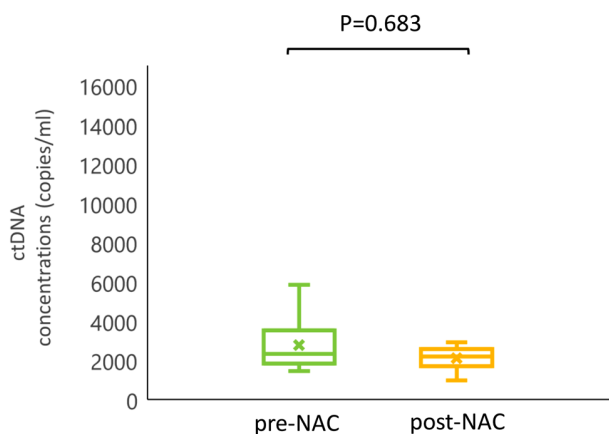

B NAC-resistant cases

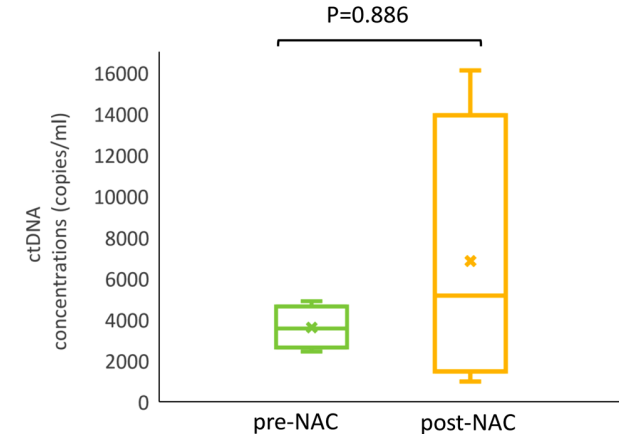

Figure S2. Genotype and VAF of *TP53* mutation in NAC-sensitive and resistant patient groups. Nine sites of *TP53* mutation were detected. In NAC-sensitive cases, VAF in post-NAC was decreased as compared to pre-NAC. In NAC-resistant cases, VAF in post-NAC was increased compared as to pre-NAC. VAF, variant allele frequency; NAC, neoadjuvant chemotherapy.

| Case No. | Genotype of <i>TP53</i> | <i>TP53</i> VAF (%) |       | response to chemotherapy |
|----------|-------------------------|---------------------|-------|--------------------------|
|          |                         | pre                 | post  |                          |
| 1        | R248W                   | 4.42                | 0     | NAC -sensitive           |
| 2        | K373R                   | 0.21                | 0     |                          |
|          | V216E                   | 0.65                | 0     |                          |
| 3        | R213*                   | 0.35                | 0     |                          |
| 4        | Q136E                   | 2.68                | 0.12  | NAC -resistant           |
| 7        | Y234N                   | 0                   | 0.54  |                          |
|          | H193R                   | 0                   | 0.29  |                          |
|          | V143A                   | 0                   | 0.59  |                          |
| 10       | H179Y                   | 6.43                | 37.79 |                          |
